# Supplementary material for: Increased N6-methyladenosine in Human Sperm RNA as a Risk Factor for Asthenozoospermia
Source: PubMed Central journal article supplement (PMC4829835; doi:10.1038/srep24345), 2016-04-13
Supplement: srep24345-s1.pdf [file srep24345-s1.pdf]

# Increased N6-methyladenosine in Human Sperm RNA as a Risk Factor for Asthenozoospermia

Ying Yang,<sup>1,†</sup> Wei Huang,<sup>2,†</sup> Jing-Tao Huang,<sup>1</sup> Fan Shen,<sup>1</sup> Jun Xiong,<sup>2</sup> Er-Feng Yuan,<sup>1</sup>

Shan-shan Qin,<sup>2</sup> Ming Zhang,<sup>3</sup> Yu-Qi Feng,<sup>2,\*</sup> Bi-Feng Yuan,<sup>2,\*</sup> Song-Mei Liu<sup>1,\*</sup>

<sup>1</sup> Center for Gene Diagnosis, Zhongnan Hospital of Wuhan University, Donghu Road 169#,  
Wuhan, 430071, P.R. China

<sup>2</sup> Key Laboratory of Analytical Chemistry for Biology and Medicine (Ministry of Education),  
Department of Chemistry, Wuhan University, Wuhan, 430072, P. R. China

<sup>3</sup> Reproductive Medicine Center, Zhongnan Hospital of Wuhan University, Donghu Road  
169#, Wuhan, 430071, P.R. China

†These authors contributed equally to this work.

\*To whom correspondence should be addressed. Tel. +86-27-67812610; fax.

+86-27-67812610. E-mail address: Song-Mei Liu, smliu@whu.edu.cn; Bi-Feng Yuan,

bfyuan@whu.edu.cn; Yu-Qi Feng, yqfeng@whu.edu.cn.

**Fig. S1. Melt curves and standard curves of real-time PCR for *METTL3* and *METTL14*. (A-B), melt curve and standard curve for *METTL3*. (C-D), melt curve and standard curve for *METTL14*.**

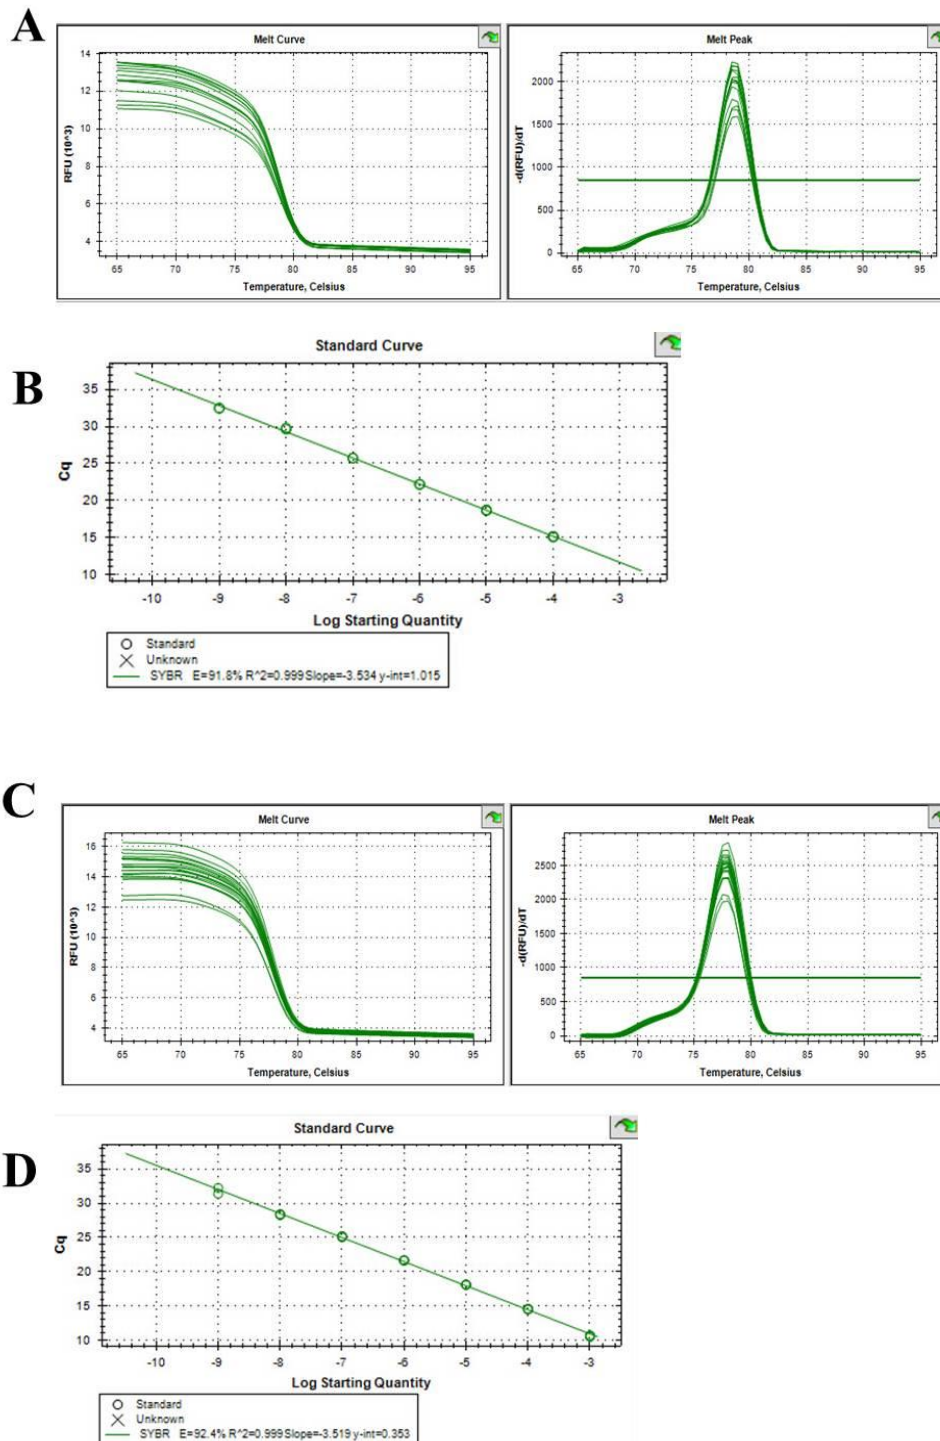

**Fig. S2. Correlation of m<sup>6</sup>A contents with gene expressions in sperm RNA.** (A-E), Correlation analysis between m<sup>6</sup>A contents and mRNA expression in all subjects.

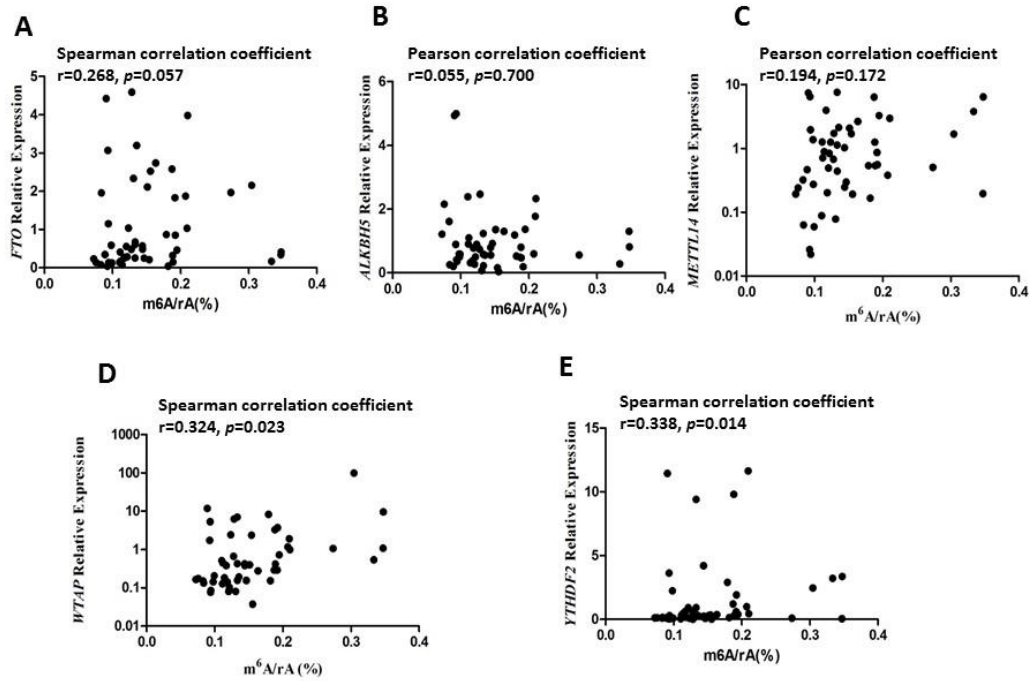

**Fig. S3. Microscopic examination of the sperms before and after purification (400×).**

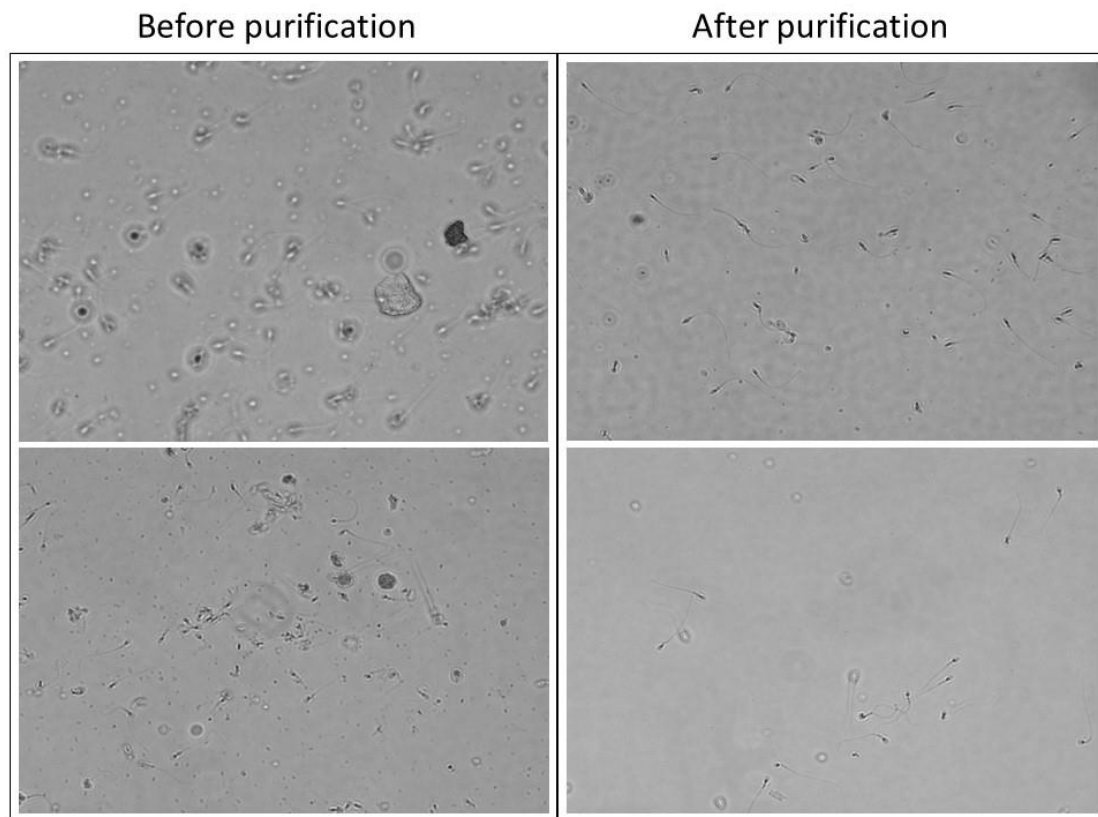

**Table S1. Linearity, LOD and LOQ of m<sup>6</sup>A by LC-ESI-MS/MS.**

| Analyte          | Linear range<br>(m <sup>6</sup> A/rA,%) | Regression line    |                    | R <sup>2</sup> | LOD<br>(fmol) | LOQ<br>(fmol) |
|------------------|-----------------------------------------|--------------------|--------------------|----------------|---------------|---------------|
|                  |                                         | Slope              | Intercept          |                |               |               |
| m <sup>6</sup> A | 0.02-2                                  | 0.0396 ±<br>0.0003 | 0.0012 ±<br>0.0001 | 0.997<br>7     | 1.2           | 4.0           |

**Table S2. Preparation of the quality control (QC) samples with m<sup>6</sup>A-containing oligonucleotides.**

| Methylation level              | Molar ratio (%)                         |                |
|--------------------------------|-----------------------------------------|----------------|
|                                | m <sup>6</sup> A/A (%)                  | RNA standard 1 |
| 0.050                          | 0.16                                    | 99.84          |
| 0.100                          | 0.30                                    | 99.70          |
| 0.300                          | 0.91                                    | 99.09          |
| RNA standard 1<br>(15-mer RNA) | 5'- UAAUAC(m <sup>6</sup> A)GAGAAAUC-3' |                |
| RNA standard 2<br>(10-mer RNA) | 5'-AUCUAUAUGC-3'                        |                |

**Table S3. Validation of the method for the detection of m<sup>6</sup>A with QC samples.**

| <b>Nominal [m<sup>6</sup>A]/[A],%</b> |                          | <b>0.050</b> | <b>0.100</b> | <b>0.300</b> |
|---------------------------------------|--------------------------|--------------|--------------|--------------|
|                                       | Measured mean            |              |              |              |
| Day 1                                 | [m <sup>6</sup> A]/[A],% | 0.044        | 0.091        | 0.292        |
| <i>n</i> =3                           | RSD <sup>a</sup> (%)     | 5.7          | 4.3          | 1.8          |
|                                       | RE <sup>b</sup> (%)      | -12.1        | -9.2         | -2.7         |
|                                       | Measured mean            |              |              |              |
| Day 2                                 | [m <sup>6</sup> A]/[A],% | 0.055        | 0.093        | 0.321        |
| <i>n</i> =3                           | RSD (%)                  | 9.7          | 4.6          | 4.4          |
|                                       | RE (%)                   | 10.1         | -7.4         | 7.1          |
|                                       | Measured mean            |              |              |              |
| Day 3                                 | [m <sup>6</sup> A]/[A],% | 0.053        | 0.106        | 0.283        |
| <i>n</i> =3                           | RSD (%)                  | 10.6         | 5.1          | 4.8          |
|                                       | RE (%)                   | 6.4          | 5.6          | -5.7         |

<sup>a</sup> Relative standard deviation. <sup>b</sup> Relative error.

**Table S4. The results of m<sup>6</sup>A contents in semen RNA**

| Sample Name | m6A/A(%) | SD    | RSD   |
|-------------|----------|-------|-------|
| C1          | 0.15     | 0.007 | 4.69  |
| C2          | 0.12     | 0.012 | 10.42 |
| C3          | 0.19     | 0.005 | 2.52  |
| C4          | 0.11     | 0.021 | 18.62 |
| C5          | 0.08     | 0.005 | 6.72  |
| C6          | 0.10     | 0.012 | 11.95 |
| C7          | 0.08     | 0.007 | 8.99  |
| C8          | 0.09     | 0.003 | 2.80  |
| C9          | 0.14     | 0.001 | 0.85  |
| C10         | 0.11     | 0.011 | 9.45  |
| C11         | 0.09     | 0.009 | 9.74  |
| C12         | 0.12     | 0.007 | 6.10  |
| C13         | 0.13     | 0.014 | 10.56 |
| C14         | 0.12     | 0.004 | 3.85  |
| C15         | 0.07     | 0.006 | 8.38  |
| C16         | 0.09     | 0.000 | 0.16  |
| C17         | 0.11     | 0.006 | 4.98  |
| C18         | 0.08     | 0.007 | 8.72  |
| C19         | 0.16     | 0.000 | 0.15  |
| C20         | 0.13     | 0.005 | 3.81  |
| C21         | 0.19     | 0.029 | 15.28 |
| C22         | 0.13     | 0.006 | 4.71  |
| C23         | 0.21     | 0.003 | 1.52  |
| C24         | 0.21     | 0.006 | 3.00  |
| C25         | 0.16     | 0.012 | 7.85  |
| C26         | 0.19     | 0.033 | 17.02 |
| C27         | 0.12     | 0.001 | 0.86  |
| C28         | 0.09     | 0.001 | 1.21  |
| C29         | 0.21     | 0.005 | 2.21  |
| C30         | 0.18     | 0.010 | 5.80  |
| C31         | 0.14     | 0.014 | 9.78  |
| C32         | 0.15     | 0.013 | 8.68  |
| A1          | 0.35     | 0.010 | 2.95  |
| A2          | 0.11     | 0.003 | 2.61  |
| A3          | 0.14     | 0.008 | 5.88  |
| A4          | 0.18     | 0.014 | 7.65  |
| A5          | 0.13     | 0.000 | 0.19  |
| A6          | 0.10     | 0.012 | 12.70 |
| A7          | 0.27     | 0.004 | 1.60  |
| A8          | 0.19     | 0.002 | 0.98  |



---

|     |      |       |       |
|-----|------|-------|-------|
| A9  | 0.19 | 0.011 | 5.58  |
| A10 | 0.15 | 0.011 | 7.12  |
| A11 | 0.12 | 0.011 | 8.71  |
| A12 | 0.09 | 0.005 | 5.12  |
| A13 | 0.33 | 0.029 | 8.61  |
| A14 | 0.35 | 0.037 | 10.60 |
| A15 | 0.13 | 0.004 | 3.35  |
| A16 | 0.09 | 0.004 | 4.02  |
| A17 | 0.10 | 0.012 | 11.89 |
| A18 | 0.19 | 0.021 | 10.97 |
| A19 | 0.30 | 0.008 | 2.73  |
| A20 | 0.13 | 0.003 | 2.05  |

---

**Table S5. Primers used for real-time PCR**

| Genes   | Primers                                   |
|---------|-------------------------------------------|
| GAPDH   | sense 5'-TCTATAAATTGAGCCCGCAGC-3'         |
|         | anti-sense 5'-CCAATACGACCAAATCCGTTG-3'    |
| FTO     | sense 5'-CTTCACCAAGGAGACTGCTATTTTC-3'     |
|         | anti-sense 5'-CAAGGTTCCCTGTTGAGCACTCTG-3' |
| ALKBH5  | sense 5'-TCCAGTTCAAGCCTATTTCG-3'          |
|         | anti-sense 5'-CATCTAATCTTGTCTTCCTGAG-3'   |
| METTL14 | sense 5'-GAGTGTGTTTACGAAAATGGGGT-3'       |
|         | anti-sense 5'-CCGTCTGTGCTACGCTTCA-3'      |
| METTL3  | sense 5'-AGATGGGGTAGAAAGCCTCCT-3'         |
|         | anti-sense 5'-TGGTCAGCATAGGTTACAAGAGT-3'  |
| WTAP    | sense 5'-TTGTAATGCGACTAGCAACCAA-3'        |
|         | anti-sense 5'-GCTGGGTCTACCATTGTTGATCT-3'  |
| YTHDF2  | sense 5'-CCTTAGGTGGAGCCATGATTG-3'         |
|         | anti-sense 5'-TCTGTGCTACCCAACCTTCAGT-3'   |
